# Supplementary material for: Rational engineering of a Schiff base–iridium( iii ) complex for enhanced photodynamic therapy
Source: Royal Society of Chemistry journal article supplement (doi:10.1039/d5dt02158h), 2026-01-01
Supplement: d5dt02158h1.pdf [file d5dt02158h1.pdf]

## **Rational Engineering of a Schiff Base-Iridium(III) Complex for Enhanced Photodynamic Therapy**

Changlin Li,<sup>a#</sup> Xuan Liu,<sup>a#</sup> Tao Shao,<sup>d#</sup> Guodang Chen,<sup>a</sup> Jingran Xuan,<sup>a</sup> Dong Wang,<sup>e\*</sup> Zhenbao Li,<sup>abc\*</sup> Zhihui Feng<sup>abc\*</sup>

<sup>a</sup>. College of Pharmacy, Anhui University of Chinese Medicine, Hefei 230012, China.

<sup>b</sup>. Anhui Province Key Laboratory of Pharmaceutical Preparation Technology and Application, Hefei 230012, China.

<sup>c</sup>. Anhui Province Key Laboratory of the Application and Transformation of Traditional Chinese Medicine in the Prevention and Treatment of Major Pulmonary Diseases

<sup>d</sup>. College of Pharmaceutical Sciences, Anhui Xinhua University, Hefei 230088, China

<sup>e</sup>. School of Chemistry and Chemical Engineering, Anqing Normal University and Anhui Provincial Key Laboratory of Advanced Catalysis and Energy Materials, Anqing, 246003, P.R. China.

<sup>#</sup> C. L. Li, X. Liu and T. Shao are contributed equally to the work.

\* Corresponding authors: [fzh@ahtcm.edu.cn](mailto:fzh@ahtcm.edu.cn), [lizhenbao@ahtcm.edu.cn](mailto:lizhenbao@ahtcm.edu.cn), [wangdongkbz@163.com](mailto:wangdongkbz@163.com).

## 1. Detection of $^1\text{O}_2$ by absorbance method

ABDA was used to monitor  $^1\text{O}_2$  production. In detail, NCN, Ir-NCN and Ce-6 (10  $\mu\text{M}$ ) in aqueous solution were prepared in the UV cuvette. Then, ABDA (7.5 mM) was added into the above solution after irradiated with a white light for different time (0 - 100 s). The change in the absorption intensity of the indicator ABDA at 378 nm was monitored.

The  $^1\text{O}_2$  quantum yields ( $\Phi$ ) of NCN, Ir-NCN and Ce-6 were detected according to the procedure reported previously. <sup>[1]</sup> The measurements were performed with ABDA as the  $^1\text{O}_2$  indicator and Rose Bengal ( $\Phi_{\text{RB}} = 0.75$  in water) as the reference. The quantum yield for each photosensitizer ( $\Phi_{\text{PS}}$ ) was calculated according to the following equation:

$$\Phi_{\text{PS}} = \Phi_{\text{RB}} \frac{K_{\text{PS}} \cdot A_{\text{RB}}}{K_{\text{RB}} \cdot A_{\text{PS}}}$$

Here, where  $K_{\text{PS}}$  and  $K_{\text{RB}}$  are the decomposition rate constants of ABDA by the PSs and RB, respectively.  $A_{\text{PS}}$  and  $A_{\text{RB}}$  represent the light absorbed by the PSs and RB, respectively, which are determined by the integration of the areas under the absorption bands in the wavelength range of 400-700 nm.

## 2. Cell culture.

Human hepatoma cells (HepG2) were obtained from the Shanghai Institute of Biochemistry and Cell Biology, Chinese Academy of Sciences. The cells were maintained in Dulbecco's modified Eagle's medium (DMEM; Gibco) containing 4.5 g/L glucose and supplemented with 10% fetal bovine serum (FBS; Umedium, Hefei, China), 100 U/mL penicillin, 100  $\mu\text{g/mL}$  streptomycin, and 4 mM L-glutamine. Cultures were incubated at 37  $^{\circ}\text{C}$  in a humidified atmosphere of 5%  $\text{CO}_2$  and 95% air.

## 3. Dark toxicity and phototoxicity assay.

HepG2 cells were seeded in a 96-well plate at an initial density of  $5 \times 10^4$  cells per well and cultured for 24 h. The cells were then treated with various concentrations of Ir-NCN. After 12 h of incubation, the cells were directly exposed to an 400-700 nm laser (10  $\text{mW cm}^{-2}$ ) for 5 min. Cells not subjected to laser irradiation were used for

dark toxicity assays. Following further culture for 12 h, CCK-8 reagent was added to each well. Finally, cell viability was measured using a microplate reader at a detection wavelength of 450 nm. The results are expressed as the survival rate of treated cells relative to untreated control cells. The relative cell viability was calculated as follows:

$$\text{Cell viability (\%)} = \frac{OD_{\text{sample}} - OD_{\text{background}}}{OD_{\text{control}} - OD_{\text{background}}} \times 100\%$$

#### **4. Confocal imaging of cells.**

HepG2 cells in the logarithmic growth phase were seeded into confocal dishes at a density of  $5 \times 10^4$  cells/well and cultured in DMEM complete medium supplemented with 10% FBS for 24 h at 37 °C under 5% CO<sub>2</sub> to allow cell adherence. After incubation, the old medium was aspirated, and the cells were gently washed once with PBS. The experimental group was treated with Ir-NCN (10 μM), while the control group received an equal volume of PBS. All cells were then returned to the incubator and protected from light for 10 min. Following incubation, the drug-containing medium was carefully removed. A SOSG fluorescent probe working solution (2 μM), diluted in serum-free medium, was added to cover the cells completely, followed by further incubation in the dark at 37°C for 15 min. The dishes were exposed to specific LED light irradiation ( $\lambda_{\text{ex}} = 400\text{-}700$  nm, 10 mW/cm<sup>2</sup>, 10 min) for photostimulation. Control samples were kept strictly protected from light. ROS generation was dynamically monitored immediately using confocal microscopy. Under light-protected conditions, a dual-staining working solution was prepared by diluting Calcein-AM (2 μM) and PI (4 μM) in PBS or serum-free medium. After the drug incubation period, the drug-containing medium was carefully aspirated, and the cells were gently washed once with PBS. The freshly prepared Calcein-AM/PI working solution was then added to completely cover the cells, followed by incubation at 37 °C in the dark for 15 min. After incubation, the staining solution was removed and replaced with PBS. The culture dishes were exposed to specific light irradiation for phototreatment. Control samples were strictly protected from light throughout. Subsequently, observation and image acquisition were performed using a

confocal microscope. The staining procedure using the FITC/PI dual dye is similar to that of the Calcein-AM/PI method and therefore will not be repeated here.

## 5. Synthesis and characterization of NCN and Ir-NCN

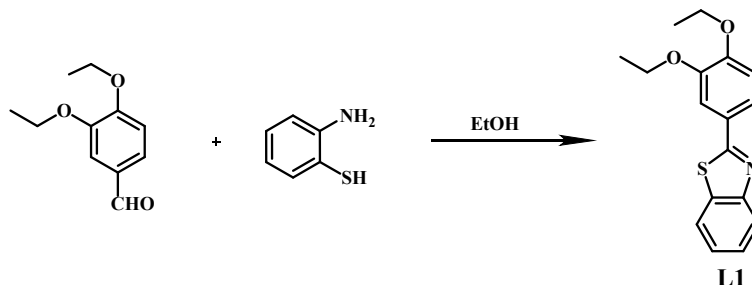

**Figure. S1** The synthesis process of ligand **L1**.

**Synthesis of L1:** The ligand **L1** was synthesized according to the literature<sup>[2]</sup>.

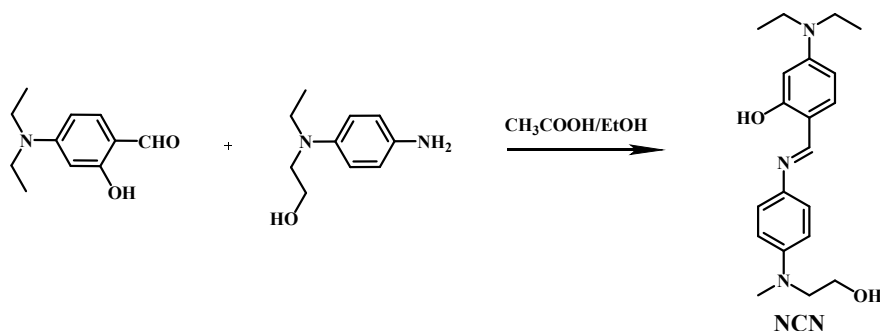

**Figure. S2** The synthesis process of ligand **NCN**.

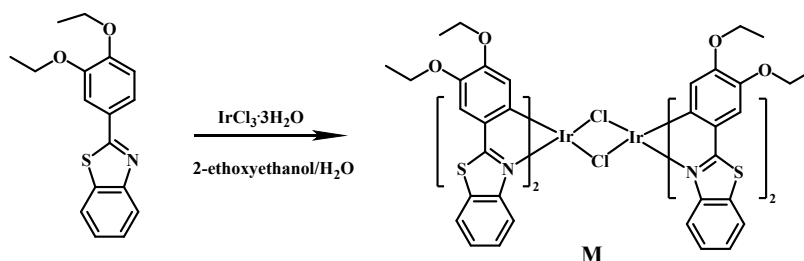

**Figure. S3** The synthesis process of the tintermediate **M**.

**Synthesis of M:** The intermediate **M** was synthesized according to the literature<sup>[1]</sup>.

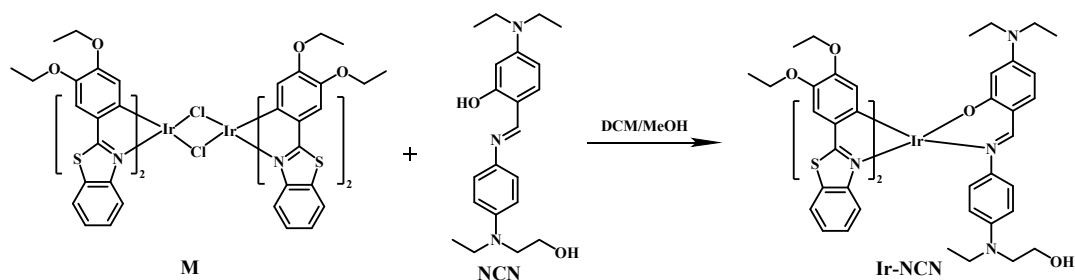

**Figure. S4** The synthesis process of complex **Ir-NCN**.

Spectrum from MASS20240510.wiff2 (sample 14) - LQ, Experiment 1, +IDA TOF MS (50 - 2000) from 0.026 to 0.093 min

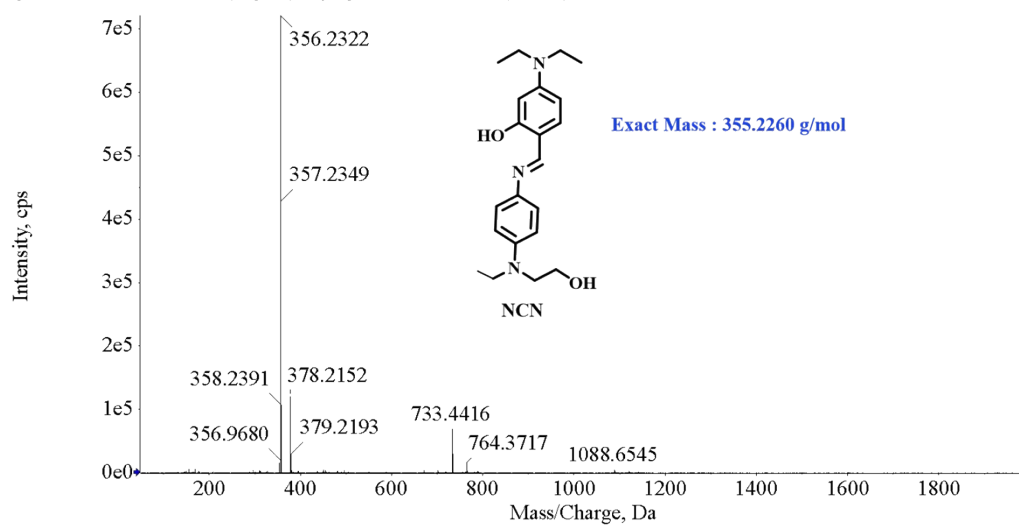

**Figure. S5** MS spectrum of NCN.

Spectrum from MASS20240510.wiff2 (sample 13) - BQ, Experiment 1, +IDA TOF MS (5...sample 13) - BQ, Experiment 1, +IDA TOF MS (50 - 2000) from 0.312 to 0.402 min]

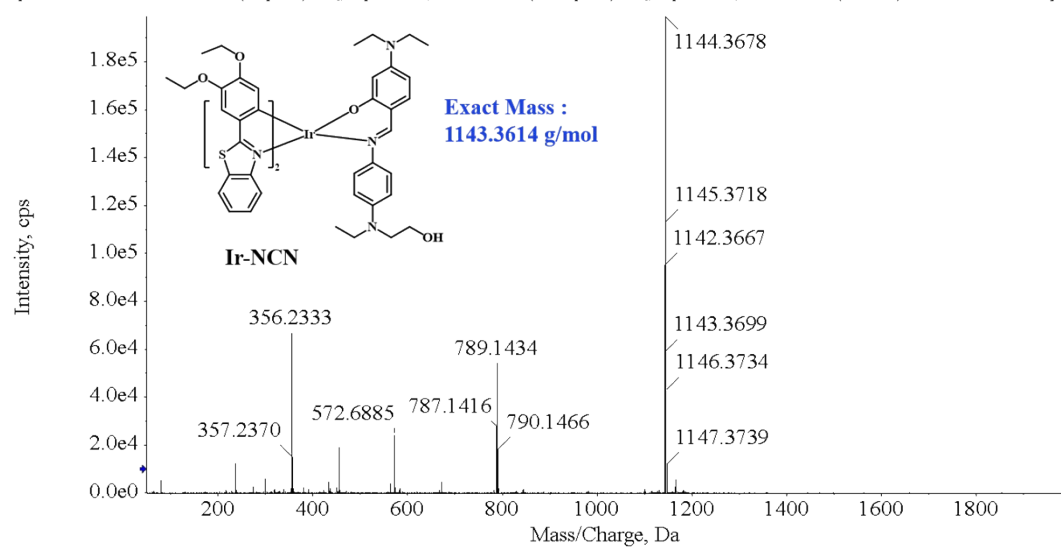

**Figure. S6** MS spectrum of Ir-NCN.

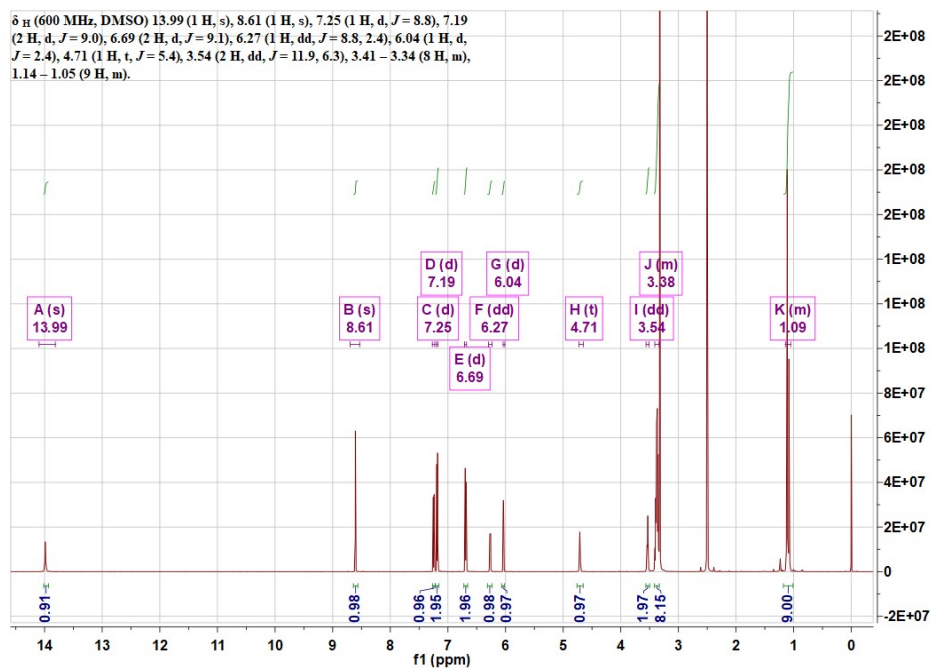

**Figure. S7**  $^1\text{H}$ -NMR spectrum of NCN in  $d_6$ -DMSO.

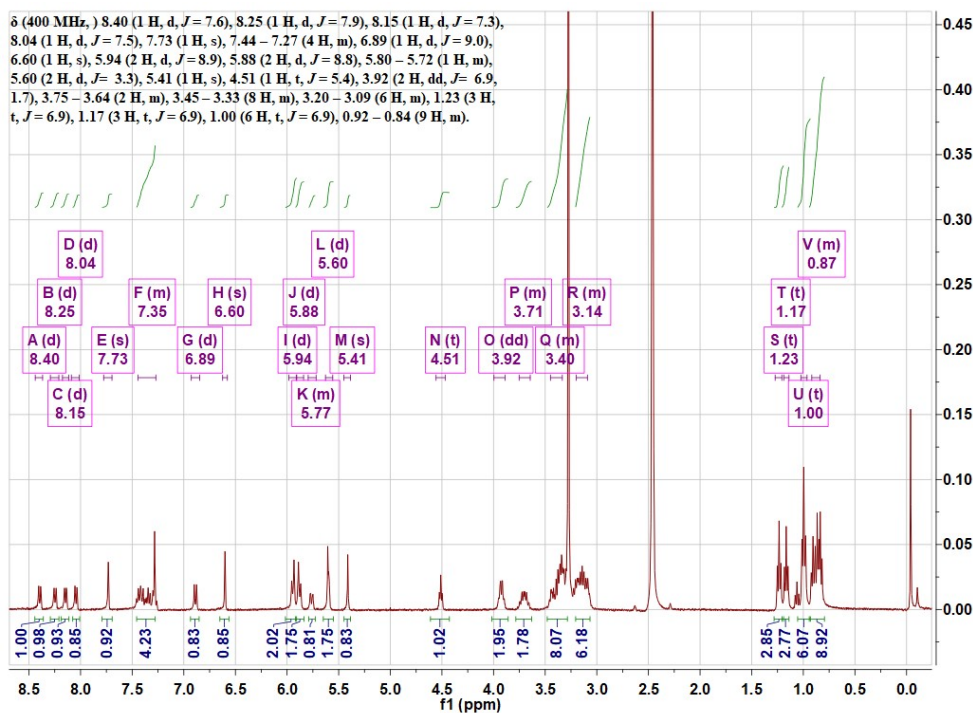

**Figure. S8**  $^1\text{H}$ -NMR spectrum of Ir-NCN in  $d_6$ -DMSO.

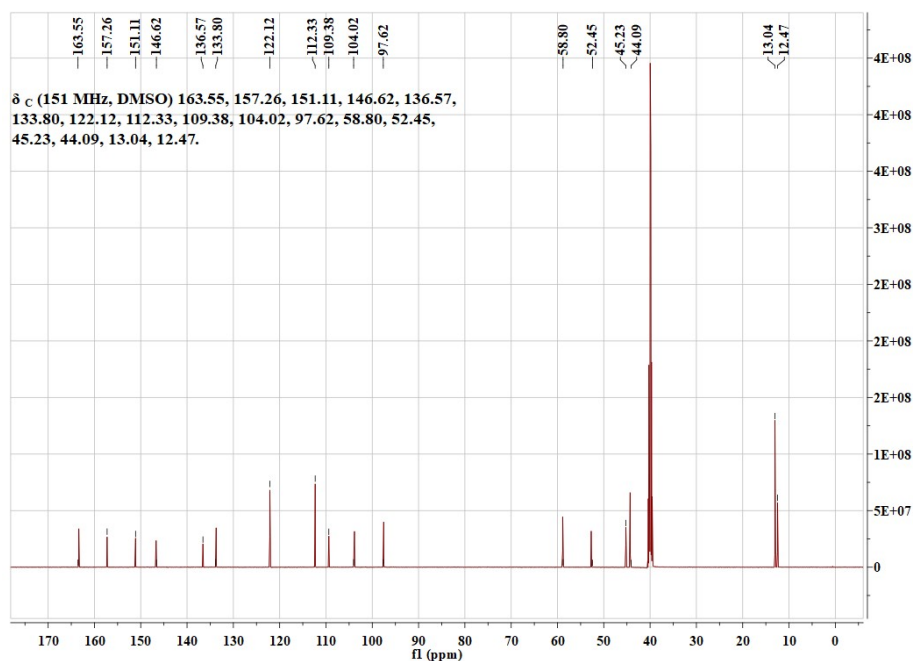

**Figure. S9**  $^{13}\text{C}$ -NMR spectrum of NCN in  $d_6$ -DMSO.

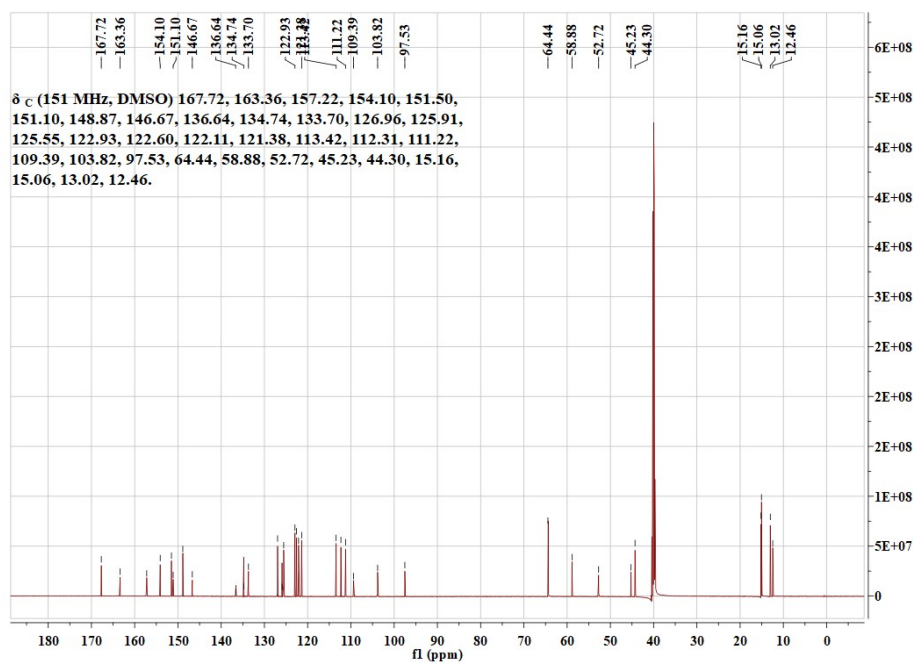

**Figure. S10**  $^{13}\text{C}$ -NMR spectrum of Ir-NCN in  $d_6$ -DMSO.

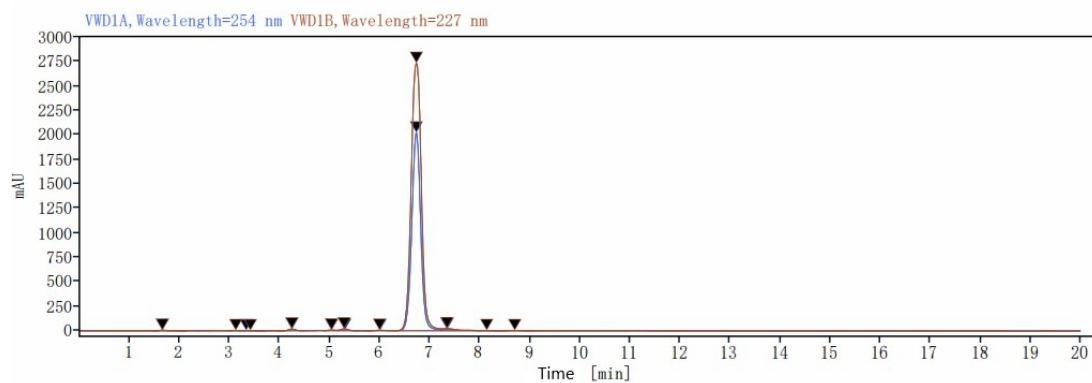

**Figure. S11** HPLC spectrum of complex **Ir-NCN** monitored at 254 nm (acetonitrile (80%) as eluent, and retention time of complex **Ir-NCN** is 6.732 min).

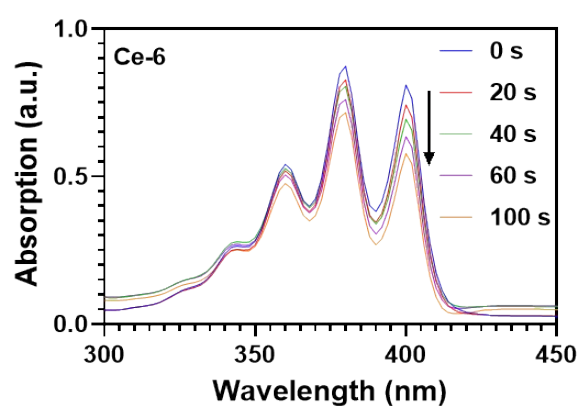

**Figure. S12** Absorbance decay of ABDA (10 mM, PBS) in the presence of Ce-6 (10  $\mu\text{M}$ ) at different irradiation times.

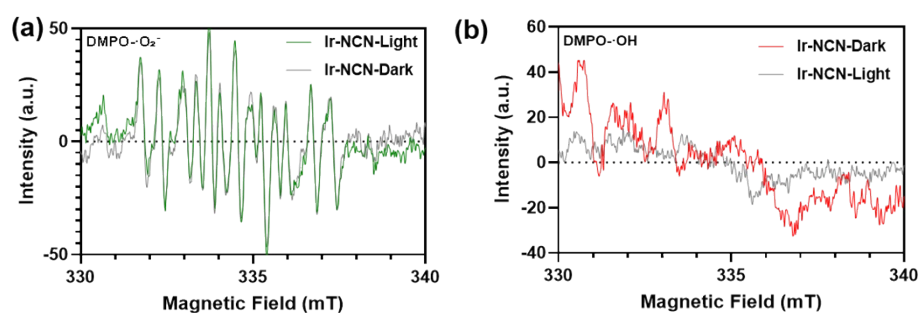

**Figure. S13** ESR spectra of (a)  $\text{DMPO} \cdot \text{O}_2^-$  and (b)  $\text{DMPO} \cdot \text{OH}$  generated by **Ir-NCN** (10  $\mu\text{M}$ , DMSO) under LED laser irradiation (400-700 nm, 10  $\text{mW cm}^{-2}$ , 1 min).

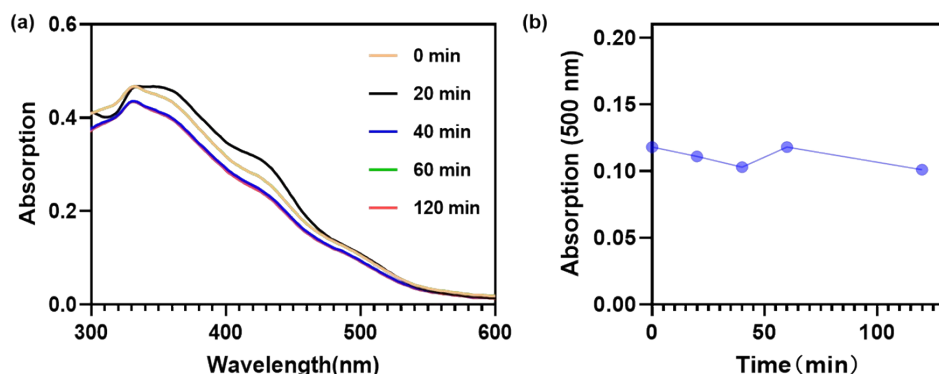

**Figure. S14** (a) UV-*Vis* absorption spectra of the complex **Ir-NCN** in aqueous medium (with 1% DMSO) under LED light irradiation (400-700 nm, 10 mW·cm<sup>-2</sup>) for different time intervals (0, 20, 40, 60, and 120 min). (b) The corresponding absorbance intensity at 500 nm as a function of irradiation time.

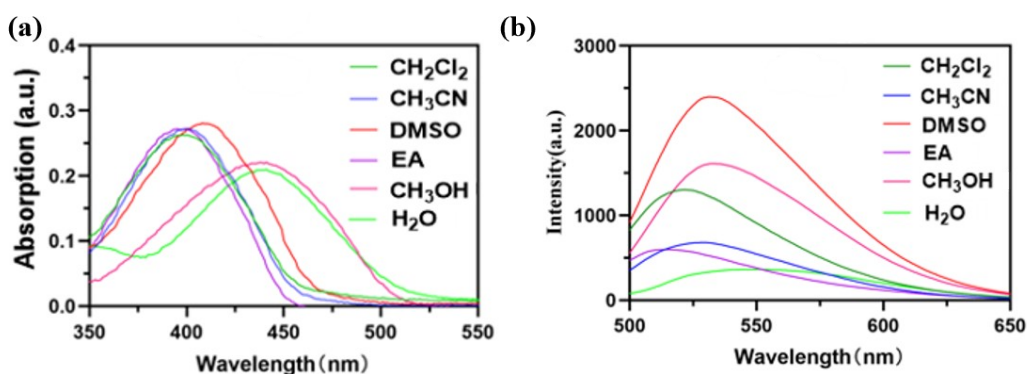

**Figure. S15** The UV-*vis* absorption (a) and emission spectra (b) of the ligand **NCN** in solvents of different polarities.

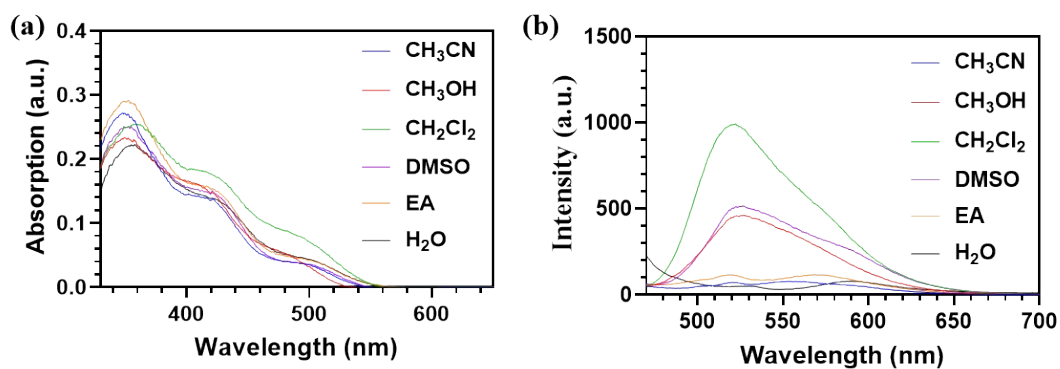

**Figure. S16** The UV-*vis* absorption (a) and emission spectra (b) of the complex **Ir-NCN** in solvents of different polarities.

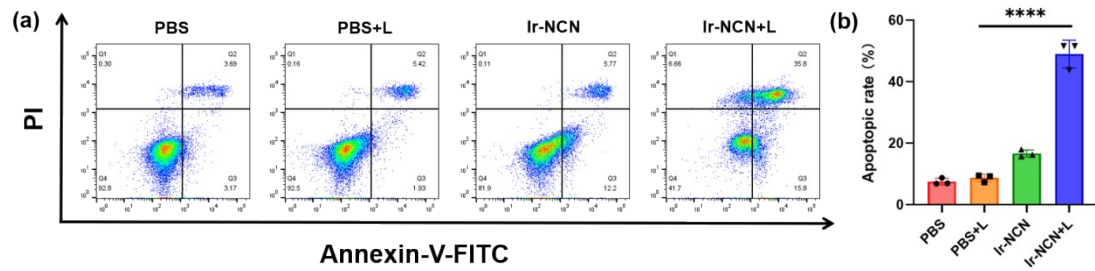

**Figure. S17** (a) Cell apoptosis assay of 4T1 cells treated with **Ir-NCN** (10  $\mu$ m) with or without light irradiation via Annexin V/PI staining. (b) Bar graph of quantitative statistics for each group. Results were presented as mean  $\pm$  SD (n = 3, \*\*\*\*p < 0.0001).

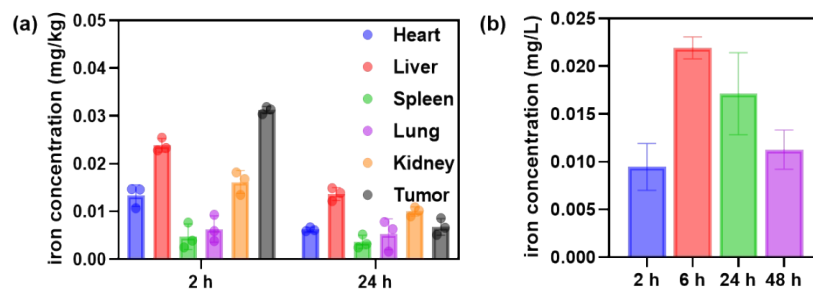

**Figure. S18** (a) The biodistribution in major organs (heart, liver, spleen, kidney, lung) and tumors at 2 h and 24 h was determined using ICP-MS. (b) Concentration of iridium in the mice blood after intravenous injection of **Ir-NCN** (n=3).

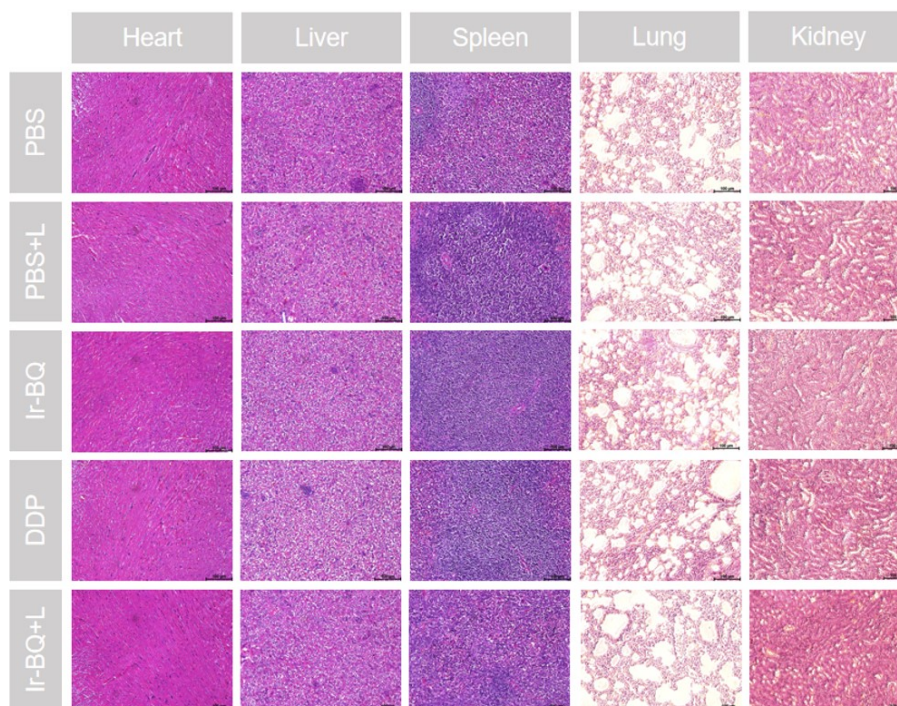

**Figure. S19** H&E-stained images of major organ sections (heart, liver, spleen, lung, kidney) from 4T1 tumor-bearing mice (scale bar: 50  $\mu$ m).

**Table S1** The calculation results of  $^1\text{O}_2$  generation capability

| Comp.  | NCN    | Ir-NCN  | Ce-6    | RB     |
|--------|--------|---------|---------|--------|
| K      | 0.0004 | 0.00171 | 0.00138 | 0.0041 |
| A      | 13.78  | 8.22    | 10.62   | 10.40  |
| $\Phi$ | 0.0055 | 0.39    | 0.25    | 0.75   |

**Table S2**  $^1\text{O}_2$  quantum yields of various photosensitizers

| Complexes name       | $\lambda_{\text{ex}}(\text{nm})$ | $\Phi(^1\text{O}_2)$                                 | Reference                                     |
|----------------------|----------------------------------|------------------------------------------------------|-----------------------------------------------|
| Ir1                  | 413 nm                           | 0.076                                                | Sens. Actuators B Chem., 2025, 437, 137741.   |
| Ir2                  | 429 nm                           | 0.275                                                |                                               |
| Ir3                  | 450 nm                           | 0.036                                                |                                               |
|                      |                                  | (RB as reference)                                    |                                               |
| 1a-4a                | 360-550 nm                       | 1a-4a: 0.13-0.80                                     | JACS Au., 2025, 5, 6, 2825-2836.              |
| 1b-4b                | 360-550 nm                       | 1b: 0.51                                             |                                               |
|                      |                                  | 2b-4b: 0.82-0.98                                     |                                               |
|                      |                                  | (Ru(bpy) <sub>3</sub> ]Cl <sub>2</sub> as reference) |                                               |
| Ir(ppy) <sub>3</sub> | 400 nm                           | 0.50                                                 | Inorg. Chem.. 2025, 64, 14, 6898-6911.        |
| Ir-COOH              | 400 nm                           | 0.44                                                 |                                               |
| Ir-PNA               | 400 nm                           | 0.54                                                 |                                               |
|                      |                                  | (Ru(bpy) <sub>3</sub> ]Cl <sub>2</sub> as reference) |                                               |
| IrC2                 | 379 nm                           | Not mentioned                                        | J. Inorg. Biochem., 2025, 262, 112760.        |
| IrC4                 | 376 nm                           |                                                      |                                               |
| IrC6                 | 380 nm                           |                                                      |                                               |
| IrC8                 | 383 nm                           |                                                      |                                               |
| IrC12                | 386 nm                           |                                                      |                                               |
| Ir-S-S-Ir            | 492 nm                           | 0.76                                                 | Inorg. Chem., 2024, 63, 50, 24030–24040.      |
| Ir-C-C-Ir            | 488 nm                           | 0.31                                                 |                                               |
| Ir-C                 | 489 nm                           | 0.023                                                |                                               |
|                      |                                  | (MB as reference)                                    |                                               |
| Complex 1            | 392 nm                           | 0.58                                                 | Dalton Trans., 2024,53, 17934-17947.          |
| Complex 2            | 438 nm                           | 0.76                                                 |                                               |
| Complex 3            | 430 nm                           | 0.64                                                 |                                               |
| Complex 4            | 441 nm                           | 0.60                                                 |                                               |
|                      |                                  | (Ru(bpy) <sub>3</sub> ]Cl <sub>2</sub> as reference) |                                               |
| IRDI                 | 365 nm                           | 0.49                                                 | ACS Appl. Bio Mater., 2023, 6, 12, 5776-5788. |
| IRMO                 | 365 nm                           | 0.28                                                 |                                               |
|                      |                                  | (Ru(bpy) <sub>3</sub> ]Cl <sub>2</sub> as reference) |                                               |
| Ir1@DEDTC            | 405 nm                           | 0.281                                                | Inorg. Chem., 2023, 62, 20080-20095.          |
| Ir1@MORDTC           | 405 nm                           | 0.239                                                |                                               |
| Ir1@MEDTC            | 365 nm                           | 0.271                                                |                                               |

|                       |        |                                                      |                                          |
|-----------------------|--------|------------------------------------------------------|------------------------------------------|
| Ir2@DEDTC             | 450 nm | 0.864                                                |                                          |
| Ir2@MORDTC            | 450 nm | 0.705                                                |                                          |
|                       |        | (MB as reference)                                    |                                          |
| Ir-Biotin             | 400nm  | 0.19                                                 | J. Mater. Chem. B., 2022,10, 5765-5773.  |
|                       |        | (MB as reference)                                    |                                          |
| LDIr1                 | 405 nm | 0.79                                                 | Dyes Pigm., 2022, 203, 110387.           |
| LDIr2                 | 405 nm | 0.84                                                 |                                          |
|                       |        | (Ru(bpy) <sub>3</sub> ]Cl <sub>2</sub> as reference) |                                          |
| BODIPY-Ir             | 500 nm | 0.35                                                 | Dalton. Trans., 2021, 50, 14332-14341.   |
|                       |        | (RB as reference)                                    |                                          |
| Ir-OH                 | 500 nm | 0.31                                                 | Inorg. Chem. Front., 2021, 8, 5045-5053. |
| Ir-B(OH) <sub>2</sub> | 405 nm | 0.32                                                 |                                          |
|                       |        | (RB as reference)                                    |                                          |
| 1a-FCPF               | 467 nm | 0.51                                                 |                                          |
| 2a-FCPF               | 473 nm | 0.45                                                 |                                          |
| 3a-FCPF               | 419 nm | 0.55                                                 | Inorg. Chem., 2020, 59, 14796.           |
| 4a-FCPF               | 419 nm | 0.54                                                 |                                          |
| 5a-FCPF               | 440 nm | 0.69                                                 |                                          |
| 6a-FCPF               | 438 nm | 0.63                                                 |                                          |
|                       |        | (MB as reference)                                    |                                          |
| NIR-Ir-XE             | 510 nm | 0.75                                                 | Biomater. Sci., 2021,9, 4843-4853.       |
|                       |        | (Ru(bpy) <sub>3</sub> ]Cl <sub>2</sub> as reference) |                                          |
| This work             | 450nm  | 0.39                                                 |                                          |
| Ir-NCN                |        | (RB as reference)                                    |                                          |

## References:

- [1] B. Ni, H. Z. Cao, C. K. Zhang, S. L. Li, Q. Zhang, X. H. Tian, D. D. Li, J. Y. Wu and Y. P. Tian. Activated type I and type II process for two-photon promoted ROS generation: the coordinated Zn matters. *Inorg. Chem.*, 2020, **59**, 13671-13678.
- [2] F. Li, C. L. Li, W. J. Huang, W. Y. Li, Y. Q. Zhang, Z. B. Li, Y. Liu, J. B. Tong, D. Wang and Z. H. Feng. Rational design of iridium complex with double-locked mitochondria-targeting for dynamic viscosity monitoring and precision two-photon tumor imaging. *Sens. Actuators B Chem.*, 2025, 442, 138145.
